# Supplementary material for: Combined neonicotinoid pesticide and parasite stress alter honeybee queens’ physiology and survival
Source: PubMed Central journal article supplement (PMC5005999; doi:10.1038/srep31430), 2016-08-31
Supplement: srep31430-s1.pdf [file srep31430-s1.pdf]

## Supplementary Information

### **Combined neonicotinoid pesticide and parasite stress alter honeybee queens' physiology and survival**

Claudia Dussaubat<sup>1,2,4\*</sup>, Alban Maisonnasse<sup>1,3,4</sup>, Didier Crauser<sup>1,4</sup>, Sylvie Tchamitchan<sup>1,4</sup>, Marc Bonnet<sup>1,4</sup>, Marianne Cousin<sup>1,4</sup>, André Kretzschmar<sup>2,4</sup>, Jean-Luc Brunet<sup>1,4</sup>, Yves Le Conte<sup>1,4</sup>

#### **Affiliations:**

<sup>1</sup>INRA, UR 406 Abeilles et environnement, 84914, Avignon, France.

<sup>2</sup> INRA, UR 546 Biostatistique et Processus Spatiaux, 84914, Avignon, France.

<sup>3</sup> ADAPI (Association pour le développement de l'Apiculture), 22, Avenue Henri Pontier, 13326, Aix en Provence Cedex 1, France.

<sup>4</sup> UMT PrADE, Site Agroparc, CS 40509, Avignon, France.

\*Correspondence to: [cdussaubat@yahoo.com](mailto:cdussaubat@yahoo.com)

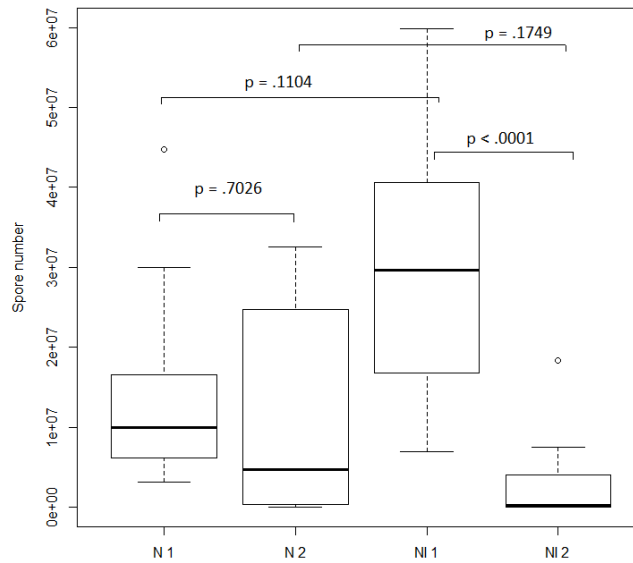

**Supplementary Fig. S1. Verification of *Nosema ceranae* infection on queens.** Queens were orally inoculated with *N. ceranae* spores at birth and success of infection was verified 8-days post-infection. Infected groups are: N 1 = *N. ceranae* infected queens from year 1, N 2 = *N. ceranae* infected queens from year 2, NI 1 = both queens exposed to imidacloprid and infected with *N. ceranae* from year 1 and NI 2 = both queens exposed to imidacloprid and infected with *N. ceranae* from year 2. Boxplots show 1<sup>st</sup> and 3<sup>rd</sup> interquartile range with line denoting median, whiskers encompass 90 % of the individuals beyond which outliers are represented by circles. P- values (p) from Tukey post-hoc test at 95% confidence level after ANOVA are indicated; n = 10, 12, 9, 12 for N1, N2, NI1, NI2 respectively ; assumptions of normality and homogeneity of variance were checked on squared root transformed data with Shapiro-Wilk test and Bartlett's test respectively. Spore levels were similar to <sup>18</sup> under comparable experimental conditions with exception of NI from the second repetition that developed low spore levels compared to the other infected groups but producing a similar effect (Fig. 2). In C no spores were detected with exception of 3 queens from the first repetition, with levels 5 times lower than the dose used to infect experimental queens; in queens from group I no spores were detected.

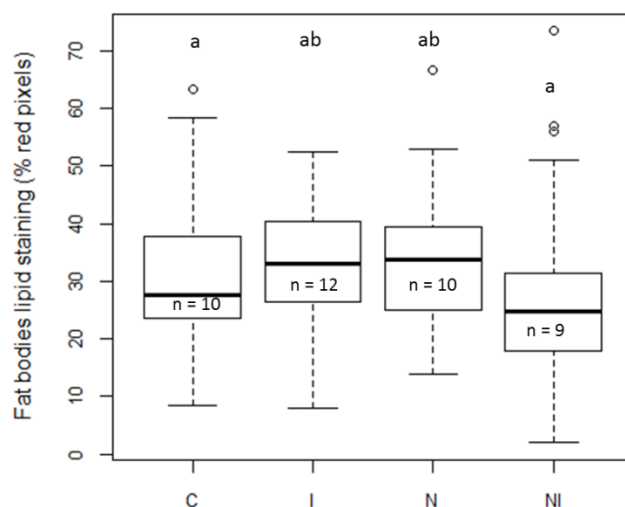

**Supplementary Fig. S2. Histological analysis of lipid stores in the fat bodies of 8-days-old queens exposed to imidacloprid and infected with *N. ceranae*.** Groups are: I = imidacloprid exposed queens, N = *N. ceranae* infected queens, NI = both queens exposed to imidacloprid and infected with *N. ceranae* and C = control. Boxplots show 1<sup>st</sup> and 3<sup>rd</sup> interquartile range with line denoting median, whiskers encompass 90 % of the individuals beyond which outliers are represented by circles. Sample size is indicated in each boxplot. Different letters denote statistical differences < 5% with ANOVA and Tukey post-hoc test at 95% confidence level, assumptions of normality and homogeneity of variance were checked with Shapiro-Wilk test and Levene's test respectively after percentage data was transformed to arsine of squared root ( $x/100$ ). ANOVA,  $F = 4.673$ ,  $p$  – value = 0.00344; Tukey post-hoc test: C vs. I:  $p$  – value = 0.9715, C vs. N:  $p$  – value = 0.7868, C vs. NI:  $p$  – value = 0.0589, I vs. N:  $p$  – value = 0.9482, I vs NI:  $p$  – value = 0.0118, N vs NI:  $p$  – value = 0.0033. All queens cumulated similar energy reserves presenting then comparable nutritional status after laboratory rearing. Histological analysis of lipid stores in the queens' fat bodies was done using the Oil Red O staining method proved to be efficient in detecting differences in lipid content in honeybee workers and queens<sup>18</sup>. The sternites 3–7 were dissected out of the queens' abdomens where the fat bodies are attached to be then rubbed onto a slide, fixed with 10% formaldehyde, and washed with 60% isopropanol. Then slides were stained with Oil Red O for 15 min and washed with water. The stained tissue was observed under microscope at 400x and 5 pictures of each slide were taken using a CANON Powershot A650 digital camera. Lipid content was quantified by automatically counting red pixels with Adobe Photoshop version 7.0.

| Treatment group | Sugar syrup consumption<br>( $\mu\text{g}/\text{bee}/\text{day}$ ) |
|-----------------|--------------------------------------------------------------------|
| C               | 11.54 $\pm$ 4.5                                                    |
| I               | 11.99 $\pm$ 4.27                                                   |
| N               | 12.02 $\pm$ 4.38                                                   |
| NI              | 13.65 $\pm$ 4.32                                                   |

**Supplementary Table S1. Consumption of sugar syrup 50% (w/v) per worker bee and per day in micro-grams during queen rearing in cages at the laboratory.** The queen and 30 attending workers kept in laboratory cages were fed with sugar syrup contaminated with the pesticide or not during 10 h a day until queens were 8 days old. Syrup consumption was estimated each day based on the difference of feeders' weight before and after the 10 h of exposition. There were 29 cages per treatment from trials carried out on the first year of experiment. Groups are: I = queens exposed to 0.7  $\mu\text{g}/\text{l}$  of imidacloprid, N = *N. ceranae* infected queens, NI = both queens exposed to imidacloprid and infected with *N. ceranae* and C = control. Values are mean  $\pm$  standard error.
